# Supplementary material for: Prevalence and Effect of Low Skeletal Muscle Mass among Hepatocellular Carcinoma Patients Undergoing Systemic Therapy: A Systematic Review and Meta-Analysis
Source: MDPI journal article supplement (doi:10.3390/cancers15092426), 2023-04-23

# **Prevalence and Effect of Low Skeletal-Muscle Mass among Hepatocellular Carcinoma Patients Undergoing Systemic Therapy: A Systematic Review and Meta-Analysis**

## **Supplemental Materials**

**Table S1 - PRISMA checklist**

**Table S2 - Search strategy**

**Table S3 - Excluded studies and reasons**

**Table S4- Quality of the included cohort studies as assessed by Newcastle–Ottawa Scale.**

**Table S5 - Subgroup analysis of the prevalence of LSMM among HCC patients undergoing systemic therapy**

**Table S6 - Subgroup analysis of HR and 95% confidence interval of overall survival among HCC patients undergoing systemic therapy with and without LSMM**

**Table S7. Subgroup analysis HR and 95% confidence interval of progression free survival among HCC patients undergoing systemic therapy with and without LSMM**

**Figure S1. Publication bias**

**Figure S2. Sensitivity analysis**

**Table S1. PRISMA checklist**

| Section/topic             | # | Checklist item                                                                                                                                                                                                                                                                                              | Reported on page # |
|---------------------------|---|-------------------------------------------------------------------------------------------------------------------------------------------------------------------------------------------------------------------------------------------------------------------------------------------------------------|--------------------|
| <b>TITLE</b>              |   |                                                                                                                                                                                                                                                                                                             |                    |
| Title                     | 1 | Identify the report as a systematic review, meta-analysis, or both.                                                                                                                                                                                                                                         | Page 1             |
| <b>ABSTRACT</b>           |   |                                                                                                                                                                                                                                                                                                             |                    |
| Structured summary        | 2 | Provide a structured summary including, as applicable: background; objectives; data sources; study eligibility criteria, participants, and interventions; study appraisal and synthesis methods; results; limitations; conclusions and implications of key findings; systematic review registration number. | Page 3–4           |
| <b>INTRODUCTION</b>       |   |                                                                                                                                                                                                                                                                                                             |                    |
| Rationale                 | 3 | Describe the rationale for the review in the context of what is already known.                                                                                                                                                                                                                              | Page 5             |
| Objectives                | 4 | Provide an explicit statement of questions being addressed with reference to participants, interventions, comparisons, outcomes, and study design (PICOS).                                                                                                                                                  | Page 5             |
| <b>METHODS</b>            |   |                                                                                                                                                                                                                                                                                                             |                    |
| Protocol and registration | 5 | Indicate if a review protocol exists, if and where it can be accessed (e.g., Web address), and, if available, provide registration information including registration number.                                                                                                                               | Page 3             |
| Eligibility criteria      | 6 | Specify study characteristics (e.g., PICOS, length of follow-up) and report characteristics (e.g., years considered, language, publication status) used as criteria for eligibility, giving rationale.                                                                                                      | Page 6             |
| Information sources       | 7 | Describe all information sources (e.g., databases with dates of coverage, contact with study authors to identify additional studies) in the search and date last searched.                                                                                                                                  | Page 6             |
| Search                    | 8 | Present full electronic search strategy for at least one database, including any limits used, such that it could be repeated.                                                                                                                                                                               | Page 6             |

|                                    |    |                                                                                                                                                                                                                        |          |
|------------------------------------|----|------------------------------------------------------------------------------------------------------------------------------------------------------------------------------------------------------------------------|----------|
| Study selection                    | 9  | State the process for selecting studies (i.e., screening, eligibility, included in systematic review, and, if applicable, included in the meta-analysis).                                                              | Page 6-7 |
| Data collection process            | 10 | Describe method of data extraction from reports (e.g., piloted forms, independently, in duplicate) and any processes for obtaining and confirming data from investigators.                                             | Page 7   |
| Data items                         | 11 | List and define all variables for which data were sought (e.g., PICOS, funding sources) and any assumptions and simplifications made.                                                                                  | Page 7   |
| Risk of bias in individual studies | 12 | Describe methods used for assessing risk of bias of individual studies (including specification of whether this was done at the study or outcome level), and how this information is to be used in any data synthesis. | Page 7   |
| Summary measures                   | 13 | State the principal summary measures (e.g., risk ratio, difference in means).                                                                                                                                          | Page 7   |
| Synthesis of results               | 14 | Describe the methods of handling data and combining results of studies, if done, including measures of consistency (e.g., $I^2$ ) for each meta-analysis.                                                              | Page 7-8 |
| Risk of bias across studies        | 15 | Specify any assessment of risk of bias that may affect the cumulative evidence (e.g., publication bias, selective reporting within studies).                                                                           | Page 8   |
| Additional analyses                | 16 | Describe methods of additional analyses (e.g., sensitivity or subgroup analyses, meta-regression), if done, indicating which were pre-specified.                                                                       | Page 8   |
| <b>RESULTS</b>                     |    |                                                                                                                                                                                                                        |          |
| Study selection                    | 17 | Give numbers of studies screened, assessed for eligibility, and included in the review, with reasons for exclusions at each stage, ideally with a flow diagram.                                                        | Figure 1 |
| Study characteristics              | 18 | For each study, present characteristics for which data were extracted (e.g., study size, PICOS, follow-up period) and provide the citations.                                                                           | Table 1  |
| Risk of bias within studies        | 19 | Present data on risk of bias of each study and, if available, any outcome level assessment (see item 12).                                                                                                              | Table 2  |

|                               |    |                                                                                                                                                                                                          |                                                    |
|-------------------------------|----|----------------------------------------------------------------------------------------------------------------------------------------------------------------------------------------------------------|----------------------------------------------------|
| Results of individual studies | 20 | For all outcomes considered (benefits or harms), present, for each study: (a) simple summary data for each intervention group (b) effect estimates and confidence intervals, ideally with a forest plot. | Table 1                                            |
| Synthesis of results          | 21 | Present results of each meta-analysis done, including confidence intervals and measures of consistency.                                                                                                  | Figure 2-4<br>Appendix Table 4<br>Appendix Table 5 |
| Risk of bias across studies   | 22 | Present results of any assessment of risk of bias across studies (see Item 15).                                                                                                                          | Table 2                                            |
| Additional analysis           | 23 | Give results of additional analyses, if done (e.g., sensitivity or subgroup analyses, meta-regression [see Item 16]).                                                                                    | Appendix Figure 1<br>Appendix Figure 2             |
| <b>DISCUSSION</b>             |    |                                                                                                                                                                                                          |                                                    |
| Summary of evidence           | 24 | Summarize the main findings including the strength of evidence for each main outcome; consider their relevance to key groups (e.g., healthcare providers, users, and policy makers).                     | Page 11                                            |
| Limitations                   | 25 | Discuss limitations at study and outcome level (e.g., risk of bias), and at review-level (e.g., incomplete retrieval of identified research, reporting bias).                                            | Page 13                                            |
| Conclusions                   | 26 | Provide a general interpretation of the results in the context of other evidence, and implications for future research.                                                                                  | Page 14                                            |
| <b>FUNDING</b>                |    |                                                                                                                                                                                                          |                                                    |
| Funding                       | 27 | Describe sources of funding for the systematic review and other support (e.g., supply of data); role of funders for the systematic review.                                                               | Page 2                                             |

**Table S2. Search strategy**

| Database | Keyword                                                                                                                                                                             | Date          | Results |
|----------|-------------------------------------------------------------------------------------------------------------------------------------------------------------------------------------|---------------|---------|
| PubMed   | (liver cancer) AND (((sarcopenia) OR ((muscle mass) AND (hand strength)) AND (walking speed))) OR ((muscle mass) AND (hand strength)) OR ((muscle mass) AND (walking speed))        | April 05,2023 | 411     |
| Embase   | (((((("muscle mass") AND (hand strength)) AND (walking speed)) OR ("muscle mass") AND (hand strength))) OR ("muscle mass") AND (walking speed))) OR (sarcopenia) AND (liver cancer) | April 05,2023 | 814     |
| CENTRAL  | (liver cancer) AND (((sarcopenia) OR ((muscle mass) AND (hand strength)) AND (walking speed))) OR ((muscle mass) AND (hand strength)) OR ((muscle mass) AND (walking speed))        | April 05,2023 | 19      |

**Table S3. Excluded studies and reasons for exclusion**

Reason:

1. Hepatic tumors other than HCC
2. Not related to sarcopenia or muscle mass
3. Receiving other therapy than recommend systemic therapy
4. Absence of statistical data (hazard ratios and 95% confidence intervals) regarding the influence of pretreatment sarcopenia on OS or PFS
5. Overlapping population

| Citation                                                                                                                                                                                                                                                                                                                                                                                | Reasons |
|-----------------------------------------------------------------------------------------------------------------------------------------------------------------------------------------------------------------------------------------------------------------------------------------------------------------------------------------------------------------------------------------|---------|
| Zhuang CL, Zhang FM, Li W, Wang KH, Xu HX, Song CH, Guo ZQ, Shi HP. Associations of low handgrip strength with cancer mortality: a multicentre observational study. <i>J Cachexia Sarcopenia Muscle</i> . 2020 Dec;11(6):1476-1486. doi: 10.1002/jcsm.12614. Epub 2020 Sep 10. PMID: 32910535; PMCID: PMC7749566.                                                                       | 1       |
| Dello SA, Lodewick TM, van Dam RM, Reisinger KW, van den Broek MA, von Meyenfeldt MF, Bemelmans MH, Olde Damink SW, Dejong CH. Sarcopenia negatively affects preoperative total functional liver volume in patients undergoing liver resection. <i>HPB (Oxford)</i> . 2013 Mar;15(3):165-9. doi: 10.1111/j.1477-2574.2012.00517.x. Epub 2012 Jun 21. PMID: 23020663; PMCID: PMC3572275. | 1       |
| Antonelli G, Gigante E, Iavarone M, et al. Sarcopenia predicts survival in patients with advanced hepatocellular carcinoma treated with Sorafenib. <i>Journal of Hepatology</i> 2018;68:S207-S208.                                                                                                                                                                                      | 1       |
| D'Arcangelo F, Zanetto A, Aliberti C, et al. IMPACT OF PRE-TRANSPLANT SARCOPENIA ON SHORT TO MEDIUM TERM OUTCOME IN LIVER TRANSPLANT RECIPIENTS WITH AND WITHOUT HEPATOCELLULAR CARCINOMA. <i>Digestive and Liver Disease</i> 2020;52:S159.                                                                                                                                             | 1       |
| Kamo N, Kaido T, Hamaguchi Y, et al. Impact of sarcopenic obesity on outcomes in patients undergoing living donor liver transplantation. <i>Clinical Nutrition</i> 2019;38:2202-2209.                                                                                                                                                                                                   | 1       |
| Valero V, Amini N, Spolverato G, et al. Sarcopenia adversely impacts postoperative complications following resection or transplantation in patients with primary liver tumors. <i>Journal of gastrointestinal surgery : official journal of the Society for Surgery of the Alimentary Tract</i> 2015;19:272-281.                                                                        | 1       |
| Xiao LS, Li RN, Cui H, et al. Use of computed tomography-derived body composition to determine the prognosis of patients with primary liver cancer treated with immune checkpoint inhibitors: a retrospective cohort study. <i>BMC Cancer</i> 2022;22                                                                                                                                   | 1       |

|                                                                                                                                                                                                                                                                                                                                                                                                                       |   |
|-----------------------------------------------------------------------------------------------------------------------------------------------------------------------------------------------------------------------------------------------------------------------------------------------------------------------------------------------------------------------------------------------------------------------|---|
| Dodson R, Firoozmand A, Hyder O, et al. Impact of sarcopenia on outcomes following intra-arterial therapy of hepatic malignancies. <i>HPB</i> 2013;15:18.                                                                                                                                                                                                                                                             | 1 |
| Ha Y, Chon YE, Lee YB, et al. Sarcopenia as a predictor of survival and an objective measure of performance status in hepatocellular carcinoma. <i>Liver Cancer</i> 2016;5:65.                                                                                                                                                                                                                                        | 1 |
| Heil J, Heid F, Bechstein WO, et al. Sarcopenia predicts reduced liver growth and reduced resectability in patients undergoing portal vein embolization before liver resection - A DRAGON collaborative analysis of 306 patients. <i>HPB (Oxford)</i> 2022;24:413-421.                                                                                                                                                | 1 |
| Montano-Loza A, Meza-Junco J, Prado C, et al. Frequency and clinical impact of sarcopenia in cirrhotic patients with and without hepatocellular carcinoma. <i>American Journal of Gastroenterology</i> 2011;106:S125-S126.                                                                                                                                                                                            | 1 |
| Montano-Loza A, Meza-Junco J, Tandon P, et al. Muscle wasting is not associated with higher mortality after liver transplantation. <i>American Journal of Gastroenterology</i> 2012;107:S162.                                                                                                                                                                                                                         | 1 |
| Meza-Junco J, Montano-Loza A, Prado C, et al. Sarcopenia in cirrhotic patients with and without hepatocellular carcinoma. <i>Journal of Cachexia, Sarcopenia and Muscle</i> 2011;2:218.                                                                                                                                                                                                                               | 1 |
| Clement DSVM, Leerdam MEV, de Jong S, Weickert MO, Ramage JK, Tesselaar MET, Srirajaskanthan R. Prevalence of Sarcopenia and Impact on Survival in Patients with Metastatic Gastroenteropancreatic Neuroendocrine Tumours. <i>Cancers (Basel)</i> . 2023 Jan 27;15(3):782. doi: 10.3390/cancers15030782. PMID: 36765740; PMCID: PMC9913815.                                                                           | 1 |
| Gagnat G, Hobeika C, Modzelewski R, Collet CS, Di Fiore F, Druesne L, Tuech JJ, Schwarz L. Evaluation of sarcopenia biomarkers in older patients undergoing major surgery for digestive cancer. SAXO prospective cohort study. <i>Eur J Surg Oncol</i> . 2023 Jan;49(1):285-292. doi: 10.1016/j.ejso.2022.08.038. Epub 2022 Sep 6. PMID: 36167704.                                                                    | 1 |
| Guarneri G, Pecorelli N, Bettinelli A, Campisi A, Palumbo D, Genova L, Gasparini G, Provinciali L, Della Corte A, Abati M, Aleotti F, Crippa S, De Cobelli F, Falconi M. Prognostic value of preoperative CT scan derived body composition measures in resected pancreatic cancer. <i>Eur J Surg Oncol</i> . 2023 Feb 13:S0748-7983(23)00137-3. doi: 10.1016/j.ejso.2023.02.005. Epub ahead of print. PMID: 36863915. | 1 |
| Hayano K, Ohira G, Kano M, Suito H, Matsumoto Y, Kurata Y, Otsuka R, Isozaki T, Toyozumi T, Murakami K, Uesato M, Matsubara H. Prognostic Impact of Hepatic Steatosis Evaluated by CT on Immunotherapy for Gastric Cancer: Associations with Sarcopenia, Systemic Inflammation, and Hormones. <i>Oncology</i> . 2023;101(3):185-192. doi: 10.1159/000528005. Epub 2022 Nov 15. PMID: 36380615.                        | 1 |
| Keyl J, Hosch R, Berger A, Ester O, Greiner T, Bogner S, Treckmann J, Ting S, Schumacher B, Albers D, Markus P, Wiesweg M, Forsting M, Nensa F, Schuler M, Kasper S, Kleesiek J. Deep learning-based assessment of body composition and liver tumour burden for survival modelling in                                                                                                                                 | 1 |

|                                                                                                                                                                                                                                                                                                                                                                                                                                                                                                                                                                                                                                              |   |
|----------------------------------------------------------------------------------------------------------------------------------------------------------------------------------------------------------------------------------------------------------------------------------------------------------------------------------------------------------------------------------------------------------------------------------------------------------------------------------------------------------------------------------------------------------------------------------------------------------------------------------------------|---|
| advanced colorectal cancer. J Cachexia Sarcopenia Muscle. 2023 Feb;14(1):545-552. doi: 10.1002/jcsm.13158. Epub 2022 Dec 21. PMID: 36544260; PMCID: PMC9891942.                                                                                                                                                                                                                                                                                                                                                                                                                                                                              |   |
| Su CH, Chen WM, Chen MC, Shia BC, Wu SY. The Impact of Sarcopenia Onset Prior to Cancer Diagnosis on Cancer Survival: A National Population-Based Cohort Study Using Propensity Score Matching. Nutrients. 2023 Mar 1;15(5):1247. doi: 10.3390/nu15051247. PMID: 36904245; PMCID: PMC10005798.                                                                                                                                                                                                                                                                                                                                               | 1 |
| Tanaka K, Taoda A, Kashiwagi H. The impact of acute skeletal muscle loss after gastrointestinal cancer surgery on physical function. PM R. 2023 Feb;15(2):184-191. doi: 10.1002/pmrj.12774. Epub 2022 Feb 25. PMID: 35077013.                                                                                                                                                                                                                                                                                                                                                                                                                | 1 |
| Thormann M, Heitmann F, Wrobel V, Barajas Ordonez F, Pech M, Surov A, Damm R, Omari J. Sarcopenia does not limit overall survival in patients with colorectal liver metastases undergoing interstitial brachytherapy. Rofo. 2023 Mar;195(3):217-223. English. doi: 10.1055/a-1936-2937. Epub 2022 Oct 25. Erratum in: Rofo. 2023 Mar;195(3):e1. PMID: 36283404.                                                                                                                                                                                                                                                                              | 1 |
| Wang X, Zheng J, Yang H, Yang X, Cai W, Chen X, Zhang W, Shen X. Prognostic value of the preoperative albumin-bilirubin score among patients with stages I-III gastric cancer undergoing radical resection: A retrospective study. Clin Transl Sci. 2023 Feb 10. doi: 10.1111/cts.13493. Epub ahead of print. PMID: 36762709.                                                                                                                                                                                                                                                                                                                | 1 |
| Bernardi L, Roesel R, Vagelli F, Majno-Hurst P, Cristaudi A. Imaging based body composition profiling and outcomes after oncologic liver surgery. Front Oncol. 2022 Dec 8;12:1007771. doi: 10.3389/fonc.2022.1007771. PMID: 36568174; PMCID: PMC9773835.                                                                                                                                                                                                                                                                                                                                                                                     | 1 |
| Lee EK, Kang YE, Park YJ, Koo BS, Chung KW, Ku EJ, Won HR, Yoo WS, Jeon E, Paek SH, Lee YS, Lim DM, Suh YJ, Park HK, Kim HJ, Kim BH, Kim M, Kim SW, Yi KH, Park SK, Jung EJ, Choi JY, Bae JS, Hong JH, Nam KH, Lee YK, Yu HW, Go S, Kang YM; MASTER study group. A Multicenter, Randomized, Controlled Trial for Assessing the Usefulness of Suppressing Thyroid Stimulating Hormone Target Levels after Thyroid Lobectomy in Low to Intermediate Risk Thyroid Cancer Patients (MASTER): A Study Protocol. Endocrinol Metab (Seoul). 2021 Jun;36(3):574-581. doi: 10.3803/EnM.2020.943. Epub 2021 May 26. PMID: 34034365; PMCID: PMC8258337. | 1 |
| O'Neill L, Guinan E, Doyle S, Connolly D, O'Sullivan J, Bennett A, Sheill G, Segurado R, Knapp P, Fairman C, Normand C, Geoghegan J, Conlon K, Reynolds JV, Hussey J. Rehabilitation strategies following oesophagogastric and Hepatopancreaticobiliary cancer (ReStOre II): a protocol for a randomized controlled trial. BMC Cancer. 2020 May 13;20(1):415. doi: 10.1186/s12885-020-06889-z. PMID: 32404096; PMCID: PMC7222585.                                                                                                                                                                                                            | 1 |
| Slooter, M. D., et al. "Quantitative fluorescence-guided perfusion assessment of the gastric conduit to predict anastomotic complications after esophagectomy." Diseases of the Esophagus 34.5 (2021): doaa100.                                                                                                                                                                                                                                                                                                                                                                                                                              | 1 |
| Schink K, Herrmann HJ, Schwappacher R, Meyer J, Orlemann T, Waldmann E, Wullich B, Kahlmeyer A, Fietkau R, Lubgan D, Beckmann MW, Hack                                                                                                                                                                                                                                                                                                                                                                                                                                                                                                       | 1 |



|                                                                                                                                                                                                                                                                                                                                                                                                          |    |
|----------------------------------------------------------------------------------------------------------------------------------------------------------------------------------------------------------------------------------------------------------------------------------------------------------------------------------------------------------------------------------------------------------|----|
| C, Kemmler W, Siebler J, Neurath MF, Zopf Y. Effects of whole-body electromyostimulation combined with individualized nutritional support on body composition in patients with advanced cancer: a controlled pilot trial. BMC Cancer. 2018 Sep 12;18(1):886. doi: 10.1186/s12885-018-4790-y. PMID: 30208857; PMCID: PMC6134788.                                                                          |    |
| The effect of perioperative oral management on the outcomes in patients diagnosed as sarcopenia with hepato-biliary-pancreatic cancers.( <a href="https://center6.umin.ac.jp/cgi-open-bin/ctr_e/ctr_view.cgi?recptno=R000035575">https://center6.umin.ac.jp/cgi-open-bin/ctr_e/ctr_view.cgi?recptno=R000035575</a> )                                                                                     | 1  |
| Rhee H, Navaratnam A, Oleinikova I, Gilroy D, Scuderi Y, Heathcote P, Nguyen T, Wood S, Ho KKY. A Novel Liver-targeted Testosterone Therapy for Sarcopenia in Androgen Deprived Men With Prostate Cancer. J Endocr Soc. 2021 Jun 19;5(9):bvab116. doi: 10.1210/jendso/bvab116. PMID: 34308090; PMCID: PMC8294688.                                                                                        | 1  |
| Abe S, Kawai K, Nozawa H, Sasaki K, Murono K, Emoto S, Kishikawa J, Ishii H, Yokoyama Y, Nagai Y, Anzai H, Sonoda H, Oba K, Ishihara S. Preoperative sarcopenia is a poor prognostic factor in lower rectal cancer patients undergoing neoadjuvant chemoradiotherapy: a retrospective study. Int J Clin Oncol. 2022 Jan;27(1):141-153. doi: 10.1007/s10147-021-02062-z. Epub 2021 Nov 6. PMID: 34741193. | 1D |
| Zheng X, Cao F, Qian L, et al. Body Composition Changes in Hepatocellular Carcinoma: Prediction of Survival to Transcatheter Arterial Chemoembolization in Combination With Clinical Prognostic Factors. Cancer Control 2021;28.                                                                                                                                                                         | 2  |
| Hashida R, Kawaguchi T, Koya S, et al. Impact of cancer rehabilitation on the prognosis of patients with hepatocellular carcinoma. Oncology Letters 2020;19:2355-2367.                                                                                                                                                                                                                                   | 2  |
| Bettinger D, Spode R, Glaser N, et al. Survival benefit of transarterial chemoembolization in patients with metastatic hepatocellular carcinoma: A single center experience. BMC Gastroenterology 2017;17.                                                                                                                                                                                               | 2  |
| Takada H, Kurosaki M, Nakanishi H, Takahashi Y, Itakura J, Tsuchiya K, Yasui Y, Tamaki N, Takaura K, Komiyama Y, Higuchi M, Kubota Y, Wang W, Okada M, Enomoto N, Izumi N. Impact of pre-sarcopenia in sorafenib treatment for advanced hepatocellular carcinoma. PLoS One. 2018 Jun 18;13(6):e0198812. doi: 10.1371/journal.pone.0198812. PMID: 29912922; PMCID: PMC6005492.                            | 4  |
| Mir O, Coriat R, Blanchet B, Durand JP, Boudou-Rouquette P, Michels J, Ropert S, Vidal M, Pol S, Chaussade S, Goldwasser F. Sarcopenia predicts early dose-limiting toxicities and pharmacokinetics of sorafenib in patients with hepatocellular carcinoma. PLoS One. 2012;7(5):e37563. doi: 10.1371/journal.pone.0037563. Epub 2012 May 30. PMID: 22666367; PMCID: PMC3364283.                          | 4  |
| Yamashima M, Miyaaki H, Honda T, Shibata H, Miuma S, Taura N, Nakao K. Significance of psoas muscle thickness as an indicator of muscle atrophy in patients with hepatocellular carcinoma treated with sorafenib. Mol Clin Oncol. 2017 Sep;7(3):449-453. doi: 10.3892/mco.2017.1321. Epub 2017 Jul 13. PMID: 28781818; PMCID: PMC5530307.                                                                | 4  |

|                                                                                                                                                                                                                                                                                                                                                                                                                                                                                                                                                                   |   |
|-------------------------------------------------------------------------------------------------------------------------------------------------------------------------------------------------------------------------------------------------------------------------------------------------------------------------------------------------------------------------------------------------------------------------------------------------------------------------------------------------------------------------------------------------------------------|---|
| Uojima H, Chuma M, Tanaka Y, Hidaka H, Nakazawa T, Iwabuchi S, Kobayashi S, Hattori N, Ogushi K, Morimoto M, Kagawa T, Tanaka K, Kako M, Koizumi W. Skeletal Muscle Mass Influences Tolerability and Prognosis in Hepatocellular Carcinoma Patients Treated with Lenvatinib. <i>Liver Cancer</i> . 2020 Apr;9(2):193-206. doi: 10.1159/000504604. Epub 2019 Dec 6. Erratum in: <i>Liver Cancer</i> . 2022 Oct 4;11(6):581. PMID: 32399433; PMCID: PMC7206580.                                                                                                     | 4 |
| Amanuma M, Nagai H, Igarashi Y. Sorafenib Might Induce Sarcopenia in Patients With Hepatocellular Carcinoma by Inhibiting Carnitine Absorption. <i>Anticancer Res</i> . 2020 Jul;40(7):4173-4182. doi: 10.21873/anticancer.14417. PMID: 32620667.                                                                                                                                                                                                                                                                                                                 | 4 |
| Yamaoka K, Kodama K, Kawaoka T, Kosaka M, Johira Y, Shirane Y, Miura R, Yano S, Murakami S, Amioka K, Naruto K, Ando Y, Kosaka Y, Uchikawa S, Uchida T, Fujino H, Nakahara T, Murakami E, Okamoto W, Yamauchi M, Miki D, Imamura M, Takahashi S, Nagao A, Chayama K, Aikata H. The importance of body composition assessment for patients with advanced hepatocellular carcinoma by bioelectrical impedance analysis in lenvatinib treatment. <i>PLoS One</i> . 2022 Jan 18;17(1):e0262675. doi: 10.1371/journal.pone.0262675. PMID: 35041693; PMCID: PMC8765661. | 4 |
| Matsumoto H, Tsuchiya K, Hayakawa Y, et al. Clinical impact of the changes of muscle volume during various systemic therapies in patients with unresectable hepatocellular carcinoma. <i>Journal of Clinical Oncology</i> 2022;40.                                                                                                                                                                                                                                                                                                                                | 4 |
| Qayyum A, Bhosale P, Aslam R, Avritscher R, Ma J, Pagel MD, Sun J, Mohamed Y, Rashid A, Beretta L, Kaseb AO. Effect of sarcopenia on systemic targeted therapy response in patients with advanced hepatocellular carcinoma. <i>Abdom Radiol (NY)</i> . 2021 Mar;46(3):1008-1015. doi: 10.1007/s00261-020-02751-9. Epub 2020 Sep 24. PMID: 32974761; PMCID: PMC8191337.                                                                                                                                                                                            | 4 |
| Ari D, Dağlı M, Gökcan H, et al. Effects of pretransplant sarcopenia to clinical outcomes after liver transplantation. <i>Turkish Journal of Gastroenterology</i> 2019;30:S6.                                                                                                                                                                                                                                                                                                                                                                                     | 4 |
| Kobayashi A, Kaido T, Hamaguchi Y, Okumura S, Taura K, Hatano E, Okajima H, Uemoto S. Impact of postoperative changes in sarcopenic factors on outcomes after hepatectomy for hepatocellular carcinoma. <i>J Hepatobiliary Pancreat Sci</i> . 2016 Jan;23(1):57-64. doi: 10.1002/jhbp.302. Epub 2015 Dec 3. PMID: 26572789.                                                                                                                                                                                                                                       | 4 |
| Imai K, Takai K, Hanai T, et al. Skeletal muscle depletion predicts the prognosis of patients with hepatocellular carcinoma treated with sorafenib. <i>International Journal of Molecular Sciences</i> 2015;16:9612-9624.                                                                                                                                                                                                                                                                                                                                         | 4 |
| Harimoto N, Hoshino H, Muranushi R, Hagiwara K, Yamanaka T, Ishii N, Tsukagoshi M, Igarashi T, Watanabe A, Kubo N, Araki K, Shirabe K. Skeletal Muscle Volume and Intramuscular Adipose Tissue Are Prognostic Predictors of Postoperative Complications After Hepatic Resection. <i>Anticancer</i>                                                                                                                                                                                                                                                                | 4 |

Res. 2018 Aug;38(8):4933-4939. doi: 10.21873/anticancerres.12810. PMID: 30061272.

Imai K, Takai K, Hanai T, Ideta T, Miyazaki T, Kochi T, Suetsugu A, Shiraki M, Shimizu M. Skeletal muscle depletion predicts the prognosis of patients with hepatocellular carcinoma treated with sorafenib. *Int J Mol Sci*. 2015 Apr 28;16(5):9612-24. doi: 10.3390/ijms16059612. PMID: 25927582; PMCID: PMC4463608. 5

Saeki I, Yamasaki T, Maeda M, Kawano R, Hisanaga T, Iwamoto T, Matsumoto T, Hidaka I, Ishikawa T, Takami T, Sakaida I. No Muscle Depletion with High Visceral Fat as a Novel Beneficial Biomarker of Sorafenib for Hepatocellular Carcinoma. *Liver Cancer*. 2018 Oct;7(4):359-371. doi: 10.1159/000487858. Epub 2018 Apr 6. PMID: 30488024; PMCID: PMC6249591. 5

| citation                                                                                                                                                                                                                                    | reason | Treatment     |
|---------------------------------------------------------------------------------------------------------------------------------------------------------------------------------------------------------------------------------------------|--------|---------------|
| Badran H, Elsabaawy MM, Ragab A, et al. Baseline Sarcopenia is Associated with Lack of Response to Therapy, Liver Decompensation and High Mortality in Hepatocellular Carcinoma Patients. <i>Asian Pac J Cancer Prev</i> 2020;21:3285-3290. | 3      | All treatment |
| Hirota K, Kawaguchi T, Koya S, et al. Clinical utility of the Liver Frailty Index for predicting muscle atrophy in chronic liver disease patients with hepatocellular carcinoma. <i>Hepatology Research</i> 2020;50:330-341.                | 3      | All treatment |
| Sano A, Tsuge S, Kakazu E, et al. Plasma free amino acids are associated with sarcopenia in the course of hepatocellular carcinoma recurrence. <i>Nutrition</i> 2021;84.                                                                    | 3      | All treatment |
| Takada H, Amemiya F, Yasumura T, et al. Relationship between presarcopenia and event occurrence in patients with primary hepatocellular carcinoma. <i>Scientific reports</i> 2020;10:10186.                                                 | 3      | All treatment |
| Mardian Y, Yano Y, Ratnasari N, et al. "sarcopenia and intramuscular fat deposition are associated with poor survival in Indonesian patients with hepatocellular carcinoma: A retrospective study". <i>BMC Gastroenterology</i> 2019;19.    | 3      | All treatment |
| Zhao M, Duan X, Han X, et al. Sarcopenia and Systemic Inflammation Response Index Predict Response to Systemic Therapy for Hepatocellular Carcinoma and Are Associated With Immune Cells. <i>Frontiers in Oncology</i> 2022;12.             | 3      | All treatment |
| Imai K, Takai K, Watanabe S, et al. Sarcopenia impairs prognosis of patients with hepatocellular carcinoma: The role of liver functional reserve and tumor-related factors in loss of skeletal muscle volume. <i>Nutrients</i> 2017;9.      | 3      | All treatment |
| Marasco G, Dajti E, Serenari M, et al. Sarcopenia Predicts Major Complications after Resection for Primary Hepatocellular Carcinoma in Compensated Cirrhosis. <i>Cancers</i> 2022;14.                                                       | 3      | All treatment |

|                                                                                                                                                                                                                                           |   |                            |
|-------------------------------------------------------------------------------------------------------------------------------------------------------------------------------------------------------------------------------------------|---|----------------------------|
| Ha Y, Kim D, Han S, et al. Sarcopenia Predicts Prognosis in Patients with Newly Diagnosed Hepatocellular Carcinoma, Independent of Tumor Stage and Liver Function. <i>Cancer Res Treat</i> 2018;50:843-851.                               | 3 | All treatment              |
| Begini P, Gigante E, Antonelli G, et al. Sarcopenia predicts reduced survival in patients with hepatocellular carcinoma at first diagnosis. <i>Ann Hepatol</i> 2017;16:107-114.                                                           | 3 | All treatment              |
| Fujiwara N, Nakagawa H, Kudo Y, et al. Sarcopenia, intramuscular fat deposition, and visceral adiposity independently predict the outcomes of hepatocellular carcinoma. <i>Journal of Hepatology</i> 2015;63:131-140.                     | 3 | All treatment              |
| Iritani S, Imai K, Takai K, et al. Skeletal muscle depletion is an independent prognostic factor for hepatocellular carcinoma. <i>Journal of Gastroenterology</i> 2015;50:323-332.                                                        | 3 | All treatment              |
| Nagamatsu A, Kawaguchi T, Hirota K, et al. Slow walking speed overlapped with low handgrip strength in chronic liver disease patients with hepatocellular carcinoma. <i>Hepatology Research</i> 2019;49:1427-1440.                        | 3 | All treatment              |
| Dhooge M, Coriat R, Mir O, et al. Feasibility of gemcitabine plus oxaliplatin in advanced hepatocellular carcinoma patients with child-pugh B cirrhosis. <i>Oncology (Switzerland)</i> 2013;84:32-38.                                     | 3 | Chemotherapy               |
| Mir O, Coriat R, Boudou-Rouquette P, et al. Gemcitabine and oxaliplatin as second-line treatment in patients with hepatocellular carcinoma pre-treated with sorafenib. <i>Med Oncol</i> 2012;29:2793-9.                                   | 3 | Chemotherapy               |
| Kamachi S, Mizuta T, Otsuka T, et al. Sarcopenia is a risk factor for the recurrence of hepatocellular carcinoma after curative treatment. <i>Hepatology Research</i> 2016;46:201-208.                                                    | 3 | Curative treatment         |
| Santhakumar C, Bartlett AS, Plank LD, et al. Sarcopenia negatively impacts long-term outcomes following curative resection for hepatocellular carcinoma: Results of a long-term follow-up study. <i>GastroHep</i> 2020;2:215-223.         | 3 | Curative treatment         |
| Kim H, Choi HZ, Choi JM, et al. Sarcopenia with systemic inflammation can predict survival in patients with hepatocellular carcinoma undergoing curative resection. <i>Journal of Gastrointestinal Oncology</i> 2022;13:744-753.          | 3 | Curative treatment         |
| Salman A, Salman M, Moustafa A, et al. Impact of sarcopenia on two-year mortality in patients with hcv-associated hepatocellular carcinoma after radiofrequency ablation. <i>Journal of Hepatocellular Carcinoma</i> 2021;8:313-320.      | 3 | Curative treatment-RFA     |
| Yeh WS, Chiang PL, Kee KM, et al. Pre-sarcopenia is the prognostic factor of overall survival in early-stage hepatoma patients undergoing radiofrequency ablation. <i>Medicine (United States)</i> 2020;99.                               | 3 | Curative treatment-RFA     |
| Liao C, Li G, Bai Y, et al. Prognostic value and association of sarcopenic obesity and systemic inflammatory indexes in patients with hepatocellular carcinoma following hepatectomy and the establishment of novel predictive nomograms. | 3 | Curative treatment-surgery |

|                                                                                                                                                                                                                                                               |   |                            |
|---------------------------------------------------------------------------------------------------------------------------------------------------------------------------------------------------------------------------------------------------------------|---|----------------------------|
| Journal of Gastrointestinal Oncology 2021;12:669-693.                                                                                                                                                                                                         |   |                            |
| Yabusaki N, Fujii T, Yamada S, et al. Adverse impact of low skeletal muscle index on the prognosis of hepatocellular carcinoma after hepatic resection. International Journal of Surgery 2016;30:136-142.                                                     | 3 | Curative treatment-surgery |
| Berardi G, Antonelli G, Colasanti M, et al. Association of Sarcopenia and Body Composition with Short-term Outcomes after Liver Resection for Malignant Tumors. JAMA Surgery 2020;155.                                                                        | 3 | Curative treatment-surgery |
| Hayashi H, Shimizu A, Kubota K, et al. Combination of sarcopenia and prognostic nutritional index to predict long-term outcomes in patients undergoing initial hepatectomy for hepatocellular carcinoma. Asian journal of surgery 2022.                       | 3 | Curative treatment-surgery |
| Seror M, Sartoris R, Hobeika C, et al. Computed Tomography-Derived Liver Surface Nodularity and Sarcopenia as Prognostic Factors in Patients with Resectable Metabolic Syndrome-Related Hepatocellular Carcinoma. Annals of Surgical Oncology 2021;28:405-416 | 3 | Curative treatment-surgery |
| Itoh S, Shirabe K, Matsumoto Y, et al. Effect of body composition on outcomes after hepatic resection for hepatocellular carcinoma. Ann Surg Oncol 2014;21:3063-8.                                                                                            | 3 | Curative treatment-surgery |
| Kroh A, Uschner D, Lodewick T, et al. Impact of body composition on survival and morbidity after liver resection in hepatocellular carcinoma patients. Hepatobiliary and Pancreatic Diseases International 2019;18:28-37.                                     | 3 | Curative treatment-surgery |
| Bekki T, Abe T, Amano H, et al. Impact of low skeletal muscle mass index and perioperative blood transfusion on the prognosis for HCC following curative resection. BMC Gastroenterology 2020;20.                                                             | 3 | Curative treatment-surgery |
| Hiraoka A, Otsuka Y, Kawasaki H, et al. Impact of muscle volume and muscle function decline in patients undergoing surgical resection for hepatocellular carcinoma. Journal of Gastroenterology and Hepatology (Australia) 2018;33:1271-1276.                 | 3 | Curative treatment-surgery |
| Omiya S, Komatsu S, Kido M, et al. Impact of sarcopenia as a prognostic factor on reductive hepatectomy for advanced hepatocellular carcinoma. Anticancer Research 2021;41:5775-5783.                                                                         | 3 | Curative treatment-surgery |
| Yang J, Chen K, Zheng C, et al. Impact of sarcopenia on outcomes of patients undergoing liver resection for hepatocellular carcinoma. J Cachexia Sarcopenia Muscle 2022;13:2383-2392.                                                                         | 3 | Curative treatment-surgery |
| Kobayashi A, Kaido T, Hamaguchi Y, et al. Impact of Sarcopenic Obesity on Outcomes in Patients Undergoing Hepatectomy for Hepatocellular Carcinoma. Annals of Surgery 2019;269:924-931.                                                                       | 3 | Curative treatment-surgery |
| Hamaguchi Y, Kaido T, Okumura S, et al. Muscle Steatosis is an Independent Predictor of Postoperative Complications                                                                                                                                           | 3 | Curative treatment-        |

|                                                                                                                                                                                                                                          |   |                            |
|------------------------------------------------------------------------------------------------------------------------------------------------------------------------------------------------------------------------------------------|---|----------------------------|
| in Patients with Hepatocellular Carcinoma. World journal of surgery 2016;40:1959-1968.                                                                                                                                                   |   | surgery                    |
| Bajric T, Wagner D, Faschinger F, et al. Neoadjuvant therapy influences skeletal muscle mass after liver resection for malignancies. European Journal of Surgical Oncology 2022;48:e123                                                  | 3 | Curative treatment-surgery |
| Kubota R, Kumamoto T, Takeda K, et al. Pre-operative assessment of muscle mass to predict prognosis in patient with hepatocellular carcinoma. HPB 2015;17:134.                                                                           | 3 | Curative treatment-surgery |
| Hamaguchi Y, Kaido T, Okumura S, et al. Preoperative intramuscular adipose tissue content is a novel prognostic predictor after hepatectomy for hepatocellular carcinoma. Clinical Nutrition 2015;34:S11.                                | 3 | Curative treatment-surgery |
| Hamaguchi Y, Kaido T, Okumura S, et al. Preoperative muscle steatosis is a novel prognostic predictor after hepatectomy for hepatocellular carcinoma. HPB 2016;18:e215-e216.                                                             | 3 | Curative treatment-surgery |
| Hamaguchi Y, Kaido T, Okumura S, et al. Preoperative Visceral Adiposity and Muscularity Predict Poor Outcomes after Hepatectomy for Hepatocellular Carcinoma. Liver Cancer 2019;8:92-109.                                                | 3 | Curative treatment-surgery |
| Takagi K, Yagi T, Yoshida R, et al. Sarcopenia and American Society of Anesthesiologists Physical Status in the Assessment of Outcomes of Hepatocellular Carcinoma Patients Undergoing Hepatectomy. Acta medica Okayama 2016;70:363-370. | 3 | Curative treatment-surgery |
| Jang HY, Choi GH, Hwang SH, et al. Sarcopenia and visceral adiposity predict poor overall survival in hepatocellular carcinoma patients after curative hepatic resection. Translational Cancer Research 2021;10:854-866.                 | 3 | Curative treatment-surgery |
| Harimoto N, Shirabe K, Yamashita YI, et al. Sarcopenia as a predictor of prognosis in patients following hepatectomy for hepatocellular carcinoma. British Journal of Surgery 2013;100:1523-1530.                                        | 3 | Curative treatment-surgery |
| Voron T, Tselikas L, Pietrasz D, et al. Sarcopenia impacts on short- and long-term results of hepatectomy for hepatocellular carcinoma. Annals of Surgery 2015;261:1173-1183.                                                            | 3 | Curative treatment-surgery |
| Salman MA, Omar HSE, Mikhail HMS, et al. Sarcopenia increases 1-year mortality after surgical resection of hepatocellular carcinoma. ANZ J Surg 2020;90:781-785.                                                                         | 3 | Curative treatment-surgery |
| Harimoto N, Yoshizumi T, Shimokawa M, et al. Sarcopenia is a poor prognostic factor following hepatic resection in patients aged 70 years and older with hepatocellular carcinoma. Hepatology Research 2016;46:1247-1255.                | 3 | Curative treatment-surgery |
| Meister FA, Lurje G, Verhoeven S, et al. The Role of Sarcopenia and Myosteatosis in Short-and Long-Term Outcomes Following Curative-Intent Surgery for Hepatocellular Carcinoma in a European Cohort. Cancers 2022;14.                   | 3 | Curative treatment-surgery |

|                                                                                                                                                                                                                                                                                                                                                                                               |   |                                |
|-----------------------------------------------------------------------------------------------------------------------------------------------------------------------------------------------------------------------------------------------------------------------------------------------------------------------------------------------------------------------------------------------|---|--------------------------------|
| Yanagaki M, Haruki K, Taniai T, et al. The significance of osteosarcopenia as a predictor of the long-term outcomes in hepatocellular carcinoma after hepatic resection. <i>Journal of Hepato-Biliary-Pancreatic Sciences</i> 2022.                                                                                                                                                           | 3 | Curative treatment-surgery     |
| Hayashi H, Shimizu A, Kubota K, Notake T, Masuo H, Yoshizawa T, Hosoda K, Sakai H, Yasukawa K, Soejima Y. Combination of sarcopenia and prognostic nutritional index to predict long-term outcomes in patients undergoing initial hepatectomy for hepatocellular carcinoma. <i>Asian J Surg.</i> 2023 Feb;46(2):816-823. doi: 10.1016/j.asjsur.2022.07.122. Epub 2022 Aug 10. PMID: 35961897. | 3 | Curative treatment-surgery     |
| Wu DH, Liao CY, Wang DF, Huang L, Li G, Chen JZ, Wang L, Lin TS, Lai JL, Zhou SQ, Qiu FN, Zhang ZB, Chen YL, Wang YD, Zheng XC, Tian YF, Chen S. Textbook outcomes of hepatocellular carcinoma patients with sarcopenia: A multicenter analysis. <i>Eur J Surg Oncol.</i> 2023 Apr;49(4):802-810. doi: 10.1016/j.ejso.2022.12.009. Epub 2022 Dec 22. PMID: 36586787.                          | 3 | Curative treatment-surgery     |
| Yang J, Wang D, Ma L, An X, Hu Z, Zhu H, Zhang W, Chen K, Ma J, Yang Y, Wu L, Chen G, Wang Y. Sarcopenia negatively affects postoperative short-term outcomes of patients with non-cirrhosis liver cancer. <i>BMC Cancer.</i> 2023 Mar 6;23(1):212. doi: 10.1186/s12885-023-10643-6. PMID: 36879265; PMCID: PMC9987146.                                                                       | 3 | Curative treatment-surgery     |
| Xing J, Wan X, Sang X, Yang H, Du S. Perioperative management of patients with liver cancer complicated with sarcopenia. <i>Hepatobiliary Surg Nutr.</i> 2022 Dec;11(6):906-908. doi: 10.21037/hbsn-22-485. PMID: 36523921; PMCID: PMC9745625.                                                                                                                                                | 3 | Curative treatment-surgery     |
| Gau RY, Tsai HI, Yu MC, Chan KM, Lee WC, Wang HE, Wang SF, Cheng ML, Chiu CC, Chen HY, Lee CW. Laparoscopic liver resection is associated with less significant muscle loss than the conventional open approach. <i>World J Surg Oncol.</i> 2022 Dec 4;20(1):385. doi: 10.1186/s12957-022-02854-1. PMID: 36464698; PMCID: PMC9721003.                                                         | 3 | Curative treatment-surgery     |
| Feng X, Feng Q, Li J. Platelet lymphocyte ratio and sarcopenia were associated with survival after hepatocellular carcinoma undergoing curative resection. <i>J Gastrointest Oncol.</i> 2022 Oct;13(5):2691-2692. doi: 10.21037/jgo-22-604. PMID: 36388682; PMCID: PMC9660086.                                                                                                                | 3 | Curative treatment-surgery     |
| Levolger S, van Vledder MG, Muslem R, et al. Sarcopenia impairs survival in patients with potentially curable hepatocellular carcinoma. <i>J Surg Oncol</i> 2015;112:208-13.                                                                                                                                                                                                                  | 3 | Curative treatment-surgery/RFA |
| Acosta LF, Galuppo R, García CR, et al. Association Between Sarcopenia and AFP Level in Patients Undergoing Liver Transplantation for Hepatocellular Carcinoma. <i>J Surg Res</i> 2019;238:10-15.                                                                                                                                                                                             | 3 | Curative treatment-transplant  |

|                                                                                                                                                                                                                                                                                                                            |   |                               |
|----------------------------------------------------------------------------------------------------------------------------------------------------------------------------------------------------------------------------------------------------------------------------------------------------------------------------|---|-------------------------------|
| Itoh S, Yoshizumi T, Kimura K, et al. Effect of sarcopenic obesity on outcomes of living-donor liver transplantation for hepatocellular carcinoma. <i>Anticancer Research</i> 2016;36:3029-3034.                                                                                                                           | 3 | Curative treatment-transplant |
| Grat K, Pacho R, Grat M, et al. Impact of body composition on the risk of hepatocellular carcinoma recurrence after liver transplantation. <i>Journal of Clinical Medicine</i> 2019;8.                                                                                                                                     | 3 | Curative treatment-transplant |
| Beumer BR, van Vugt JLA, Sapisochin G, et al. Impact of muscle mass on survival of patients with hepatocellular carcinoma after liver transplantation beyond the Milan criteria. <i>Journal of Cachexia, Sarcopenia and Muscle</i> 2022;13:2373-2382.                                                                      | 3 | Curative treatment-transplant |
| Kaido T, Hamaguchi Y, Okumura S, et al. Impact of sarcopenia in HBP and transplant surgery. <i>Journal of Hepato-Biliary-Pancreatic Sciences</i> 2017;24:A40.                                                                                                                                                              | 3 | Curative treatment-transplant |
| Kaido T, Uemoto S. Impact of sarcopenia in liver surgery. <i>Liver Cancer</i> 2015;4:143.                                                                                                                                                                                                                                  | 3 | Curative treatment-transplant |
| Alsebaey A, Sabry A, Rashed HS, et al. MELD-Sarcopenia is Better than ALBI and MELD Score in Patients with Hepatocellular Carcinoma Awaiting Liver Transplantation. <i>Asian Pacific journal of cancer prevention : APJCP</i> 2021;22:2005-2009.                                                                           | 3 | Curative treatment-transplant |
| Toshima T, Yoshizumi T, Kosai-Fujimoto Y, et al. Prognostic Impact of Osteopenia in Patients Who Underwent Living Donor Liver Transplantation for Hepatocellular Carcinoma. <i>World journal of surgery</i> 2020;44:258-267.                                                                                               | 3 | Curative treatment-transplant |
| Kim YR, Park S, Han S, et al. Sarcopenia as a predictor of post-transplant tumor recurrence after living donor liver transplantation for hepatocellular carcinoma beyond the Milan criteria. <i>Scientific reports</i> 2018;8:7157.                                                                                        | 3 | Curative treatment-transplant |
| Meza-Junco J, Montano-Loza AJ, Baracos VE, et al. Sarcopenia as a prognostic index of nutritional status in concurrent cirrhosis and hepatocellular carcinoma. <i>J Clin Gastroenterol</i> 2013;47:861-70.                                                                                                                 | 3 | Curative treatment-transplant |
| Tan Y, Duan T, Li B, et al. Sarcopenia defined by psoas muscle index independently predicts long-term survival after living donor liver transplantation in male recipients. <i>Quantitative Imaging in Medicine and Surgery</i> 2022;12:215-228.                                                                           | 3 | Curative treatment-transplant |
| Huang Y, Wang N, Xu L, Wu Y, Li H, Jiang L, Xu M. Albumin-Globulin Score Combined with Skeletal Muscle Index as a Novel Prognostic Marker for Hepatocellular Carcinoma Patients Undergoing Liver Transplantation. <i>J Clin Med.</i> 2023 Mar 14;12(6):2237. doi: 10.3390/jcm12062237. PMID: 36983238; PMCID: PMC10051871. | 3 | Curative treatment-transplant |
| Lin Z, Li H, He C, Yang M, Chen H, Yang X, Zhuo J, Shen W, Hu Z, Pan L, Wei X, Lu D, Zheng S, Xu X. Metabolomic                                                                                                                                                                                                            | 3 | Curative treatment-           |



|                                                                                                                                                                                                                                                                                                                                                                                                        |   |                               |
|--------------------------------------------------------------------------------------------------------------------------------------------------------------------------------------------------------------------------------------------------------------------------------------------------------------------------------------------------------------------------------------------------------|---|-------------------------------|
| biomarkers for the diagnosis and post-transplant outcomes of AFP negative hepatocellular carcinoma. Front Oncol. 2023 Feb 9;13:1072775. doi: 10.3389/fonc.2023.1072775. PMID: 36845695; PMCID: PMC9947281.                                                                                                                                                                                             |   | transplant                    |
| Lymberopoulos P, Prakash S, Shaikh A, Bhatnagar A, Allam AK, Goli K, Goss JA, Kanwal F, Rana A, Kowdley KV, Jalal P, George Cholankeril. Long-term outcomes and trends in liver transplantation for hereditary hemochromatosis in the United States. Liver Transpl. 2023 Jan 1;29(1):15-25. doi: 10.1002/lt.26539. Epub 2022 Jul 21. PMID: 35770428; PMCID: PMC9800641.                                | 3 | Curative treatment-transplant |
| Sim JH, Kwon HM, Kim KW, Ko YS, Jun IG, Kim SH, Kim KS, Moon YJ, Song JG, Hwang GS. Associations of sarcopenia with graft failure and mortality in patients undergoing living donor liver transplantation. Liver Transpl. 2022 Aug;28(8):1345-1355. doi: 10.1002/lt.26447. Epub 2022 Apr 25. PMID: 35243771.                                                                                           | 3 | Curative treatment-transplant |
| Tomiyama T, Harada N, Toshima T, Nakayama Y, Toshida K, Morinaga A, Kosai-Fujimoto Y, Tomino T, Kurihara T, Takeishi K, Nagao Y, Morita K, Itoh S, Yoshizumi T. Donor Skeletal Muscle Quality Affects Graft Mortality After Living Donor Liver Transplantation- A Single Center, Retrospective Study. Transpl Int. 2022 Dec 9;35:10723. doi: 10.3389/ti.2022.10723. PMID: 36568139; PMCID: PMC9784912. | 3 | Curative treatment-transplant |
| Botrus G, Uson PLS, Kosiorek H, et al. Prognostic impact of Sarcopenia on clinical outcomes in advanced hepatocellular carcinoma (HCC) treated with systemic therapy. Cancer Research 2022;82.                                                                                                                                                                                                         | 3 | immunotherapy/target therapy  |
| Cheng TY, Lee PC, Chen YT, et al. Pre-sarcopenia determines post-progression outcomes in advanced hepatocellular carcinoma after sorafenib failure. Scientific reports 2020;10:18375.                                                                                                                                                                                                                  | 3 | Post Sorafenib                |
| Yang S, Zhang Z, Su T, et al. CT-based skeletal muscle loss for predicting poor survival in patients with hepatocellular carcinoma experiencing curative hepatectomy plus adjuvant transarterial chemoembolization: a preliminary retrospective study. European Journal of Medical Research 2022;27.                                                                                                   | 3 | Radioembolization             |
| Li LQ, Zhao WD, Su TS, et al. Effect of Body Composition on Outcomes in Patients with Hepatocellular Carcinoma Undergoing Radiotherapy: A Retrospective Study. Nutrition and Cancer 2022;74:3302-3311.                                                                                                                                                                                                 | 3 | Radioembolization             |
| Loannides P, Abuodeh Y, Jin W, et al. Impact of sarcopenia evaluated using the total psoas area (TPA) in patients undergoing Y-90 radioembolization for hepatocellular carcinoma (HCC). Journal of Clinical Oncology 2016;34.                                                                                                                                                                          | 3 | Radioembolization             |
| Roth G, Teyssier Y, Benhamou M, et al. Impact of sarcopenia on tumor response and survival outcomes in patients with hepatocellular carcinoma treated by trans-arterial (chemo)-embolization. World Journal of Gastroenterology                                                                                                                                                                        | 3 | Radioembolization             |

|                                                                                                                                                                                                                                                               |   |                   |
|---------------------------------------------------------------------------------------------------------------------------------------------------------------------------------------------------------------------------------------------------------------|---|-------------------|
| 2022;28:5324-5337.                                                                                                                                                                                                                                            |   |                   |
| Zhang JX, Yan HT, Ding Y, et al. Low Psoas-Muscle index is associated with decreased survival in hepatocellular carcinoma treated with transarterial chemoembolization. <i>Annals of Medicine</i> 2022;54:1562-1569.                                          | 3 | Radioembolization |
| Guichet PL, Taslakian B, Zhan C, et al. MRI-Derived Sarcopenia Associated with Increased Mortality Following Yttrium-90 Radioembolization of Hepatocellular Carcinoma. <i>CardioVascular and Interventional Radiology</i> 2021;44:1561-1569.                  | 3 | Radioembolization |
| Shiba S, Shibuya K, Katoh H, et al. No deterioration in clinical outcomes of carbon ion radiotherapy for sarcopenia patients with hepatocellular carcinoma. <i>Anticancer Research</i> 2018;38:3579-3586.                                                     | 3 | Radioembolization |
| Kobayashi T, Kawai H, Nakano O, et al. Rapidly declining skeletal muscle mass predicts poor prognosis of hepatocellular carcinoma treated with transcatheter intra-arterial therapies. <i>BMC Cancer</i> 2018;18:756.                                         | 3 | Radioembolization |
| Lanza E, Masetti C, Messana G, et al. Sarcopenia as a predictor of survival in patients undergoing bland transarterial embolization for unresectable hepatocellular carcinoma. <i>PLoS ONE [Electronic Resource]</i> 2020;15:e0232371.                        | 3 | Radioembolization |
| Loosen SH, Schulze-Hagen M, Bruners P, et al. Sarcopenia is a negative prognostic factor in patients undergoing transarterial chemoembolization (TACE) for hepatic malignancies. <i>Cancers</i> 2019;11.                                                      | 3 | Radioembolization |
| Lee J, Park S, Cho Y, et al. Skeletal muscle depletion predicts the prognosis of patients with hepatocellular carcinoma treated with radiotherapy. <i>Liver Cancer</i> 2018;7:198.                                                                            | 3 | Radioembolization |
| Fujita M, Takahashi A, Hayashi M, et al. Skeletal muscle volume loss during transarterial chemoembolization predicts poor prognosis in patients with hepatocellular carcinoma. <i>Hepatology Research</i> 2019;49:778-786.                                    | 3 | Radioembolization |
| Chien TP, Huang SF, Chan WH, et al. The combination of sarcopenia and biochemical factors can predict the survival of hepatocellular carcinoma patients receiving transarterial chemoembolization. <i>Frontiers in Oncology</i> 2022;12.                      | 3 | Radioembolization |
| Lim J, Kim KW, Ko Y, et al. The role of muscle depletion and visceral adiposity in HCC patients aged 65 and over undergoing TACE. <i>BMC Cancer</i> 2021;21:1164.                                                                                             | 3 | Radioembolization |
| Ebadi M, Moctezuma-Velazquez C, Meza-Junco J, et al. Visceral adipose tissue radiodensity is linked to mortality in hepatocellular carcinoma patients treated with selective internal radiation therapy (SIRT). <i>Canadian Liver Journal</i> 2019;2:114-115. | 3 | Radioembolization |
| Faron A, Sprinkart AM, Pieper CC, et al. Yttrium-90 radioembolization for hepatocellular carcinoma: Outcome prediction with MRI derived fat-free muscle area. <i>European Journal of Radiology</i> 2020;125.                                                  | 3 | Radioembolization |

|                                                                                                                                                                                                                                                                                                                                                                                                                           |   |                   |
|---------------------------------------------------------------------------------------------------------------------------------------------------------------------------------------------------------------------------------------------------------------------------------------------------------------------------------------------------------------------------------------------------------------------------|---|-------------------|
| Araki K, Harimoto N, Shibuya K, Watanabe A, Tsukagoshi M, Ishii N, Hagiwara K, Muranushi R, Hoshino K, Seki T, Shirabe K. Significance of Skeletal Muscle Loss in Liver Hypertrophy in Patients Undergoing Portal Vein Embolization Before Major Hepatectomy: Assessment With Body Composition and Nutritional Indicators. <i>Anticancer Res.</i> 2023 Jan;43(1):209-216. doi: 10.21873/anticancer.16151. PMID: 36585158. | 3 | Radioembolization |
| Bannangkoon K, Hongsakul K, Tubtawee T, Ina N, Chichareon P. Association of myosteatosi s with treatment response and survival in patients with hepatocellular carcinoma undergoing chemoembolization: a retrospective cohort study. <i>Sci Rep.</i> 2023 Mar 9;13(1):3978. doi: 10.1038/s41598-023-31184-9. PMID: 36894658; PMCID: PMC9998862.                                                                           | 3 | Radioembolization |
| Huang YL, Huang MC, Chang CI, Yang LH, Wu CJ, Chiu CC, Chen CY, Hsu JS, Lee KT, Chang WT. Elevated intramuscular adipose tissue content with a high Ishak fibrosis stage (>3) had a negative effect on liver regeneration in cirrhotic patients undergoing portal vein embolization. <i>Kaohsiung J Med Sci.</i> 2023 Feb;39(2):182-190. doi: 10.1002/kjm2.12622. Epub 2022 Nov 17. PMID: 36394149.                       | 3 | Radioembolization |
| Loosen SH, Jördens MS, Schoon B, Antoch G, Luedde T, Minko P, Loberg C, Roderburg C. Sarcopenia indicate poor survival in patients undergoing transarterial chemoembolization (TACE) for hepatic malignancies. <i>J Cancer Res Clin Oncol.</i> 2023 Jan 23. doi: 10.1007/s00432-022-04519-8. Epub ahead of print. PMID: 36689060.                                                                                         | 3 | Radioembolization |
| Masetti C, Pugliese N, Lofino L, Colapietro F, Ceriani R, Lleo A, Poretti D, Pedicini V, De Nicola S, Torzilli G, Rimassa L, Aghemo A, Lanza E. Myosteatosi s Is Not Associated with Complications or Survival in HCC Patients Undergoing Trans Arterial Embolization. <i>J Clin Med.</i> 2022 Dec 29;12(1):262. doi: 10.3390/jcm12010262. PMID: 36615062; PMCID: PMC9821378.                                             | 3 | Radioembolization |
| Nugent K, Good J. The oligometastatic paradigm and the role of radiotherapy. <i>Clin Med (Lond).</i> 2023 Jan;23(1):61-64. doi: 10.7861/clinmed.2022-0559. PMID: 36697003.                                                                                                                                                                                                                                                | 3 | Radioembolization |
| Masetti C, Pugliese N, Lofino L, Colapietro F, Ceriani R, Lleo A, Poretti D, Pedicini V, De Nicola S, Torzilli G, Rimassa L, Aghemo A, Lanza E. Myosteatosi s Is Not Associated with Complications or Survival in HCC Patients Undergoing Trans Arterial Embolization. <i>J Clin Med.</i> 2022 Dec 29;12(1):262. doi: 10.3390/jcm12010262. PMID: 36615062; PMCID: PMC9821378.                                             | 3 | Radioembolization |
| Yang JF, Huang WY, Lo CH, Lee MS, Lin CS, Shen PC, Dai YH, Wang YF, Chen TW. Significant muscle loss after stereotactic body radiotherapy predicts worse survival in patients with hepatocellular carcinoma. <i>Sci Rep.</i> 2022 Nov 9;12(1):19100.                                                                                                                                                                      | 3 | Radioembolization |

|                                                                                                                                                                                                                                                                                                                                                                                                                                                                                                  |   |                       |
|--------------------------------------------------------------------------------------------------------------------------------------------------------------------------------------------------------------------------------------------------------------------------------------------------------------------------------------------------------------------------------------------------------------------------------------------------------------------------------------------------|---|-----------------------|
| doi: 10.1038/s41598-022-21443-6. PMID: 36352042; PMCID: PMC9646692.                                                                                                                                                                                                                                                                                                                                                                                                                              |   |                       |
| Koya S, Kawaguchi T, Hashida R, Hirota K, Bekki M, Goto E, Yamada M, Sugimoto M, Hayashi S, Goshima N, Yoshiyama T, Otsuka T, Nozoe R, Nagamatsu A, Nakano D, Shirono T, Shimose S, Iwamoto H, Niizeki T, Matsuse H, Koga H, Miura H, Shiba N, Torimura T. Effects of in-hospital exercise on sarcopenia in hepatoma patients who underwent transcatheter arterial chemoembolization. J Gastroenterol Hepatol. 2019 Mar;34(3):580-588. doi: 10.1111/jgh.14538. Epub 2018 Dec 16. PMID: 30402913. | 3 | Radioembolization     |
| Antonelli G, Gigante E, Iavarone M, et al. Sarcopenia is associated with reduced survival in patients with advanced hepatocellular carcinoma undergoing sorafenib treatment. United European Gastroenterol J 2018;6:1039-1048.                                                                                                                                                                                                                                                                   | 3 | Sorafenib             |
| Nault JC, Pigneur F, Nelson AC, et al. Visceral fat area predicts survival in patients with advanced hepatocellular carcinoma treated with tyrosine kinase inhibitors. Dig Liver Dis 2015;47:869-76.                                                                                                                                                                                                                                                                                             | 3 | Sorafenib             |
| Sugama Y, Miyanishi K, Osuga T, et al. Combination of psoas muscle mass index and neutrophil/lymphocyte ratio as a prognostic predictor for patients undergoing nonsurgical hepatocellular carcinoma therapy. JGH Open 2021;5:1335-1343.                                                                                                                                                                                                                                                         | 3 | Target-HAIC, TACE,TKI |

HAIC, hepatic arterial infusion chemotherapy; HCC, hepatocellular carcinoma; OS, overall survival; PFS, progression-free survival; TACE, transarterial chemoembolization; TKI, tyrosine kinase inhibitor

**Table S4.** Quality of the included cohort studies as assessed by Newcastle–Ottawa Scale.

| Type of systemic therapy | First author     | Selection |    |    |    | Comparability |    | Outcome |    |    | Total points | Study quality |
|--------------------------|------------------|-----------|----|----|----|---------------|----|---------|----|----|--------------|---------------|
|                          |                  | Q1        | Q2 | Q3 | Q4 | Q1            | Q2 | Q1      | Q2 | Q3 |              |               |
| Sorafenib                | Hiraoka (2017)   | 1         | 1  | 1  | 1  | 1             | 1  | 1       | 1  | 0  | 8            | good          |
|                          | Nishikawa (2017) | 1         | 1  | 1  | 1  | 1             | 1  | 1       | 1  | 1  | 9            | good          |
|                          | Naganumaa (2017) | 0         | 1  | 1  | 1  | 0             | 1  | 1       | 1  | 0  | 6            | good          |
|                          | Antonelli (2018) | 1         | 1  | 1  | 1  | 1             | 1  | 1       | 1  | 1  | 9            | good          |
|                          | Imai (2019)      | 0         | 1  | 1  | 1  | 1             | 1  | 1       | 1  | 1  | 8            | good          |
|                          | Labeur (2019)    | 1         | 1  | 1  | 1  | 1             | 1  | 1       | 1  | 0  | 8            | good          |
|                          | Sawada (2019)    | 0         | 1  | 1  | 1  | 1             | 1  | 1       | 1  | 0  | 7            | good          |
|                          | Wu (2021)        | 0         | 1  | 1  | 1  | 0             | 1  | 1       | 1  | 0  | 6            | good          |
|                          | Saeki (2021)     | 1         | 1  | 1  | 1  | 1             | 1  | 1       | 1  | 1  | 9            | good          |
|                          | Ogushi (2022)    | 0         | 1  | 1  | 1  | 1             | 1  | 1       | 1  | 0  | 7            | good          |
| Lenvatinib               | Endo (2020)      | 0         | 1  | 1  | 1  | 1             | 1  | 1       | 0  | 1  | 7            | good          |
|                          | Hiraoka (2021)   | 1         | 1  | 1  | 1  | 1             | 1  | 1       | 1  | 0  | 8            | good          |
|                          | Dongs (2022)     | 0         | 1  | 1  | 1  | 0             | 1  | 1       | 0  | 0  | 5            | poor          |
|                          | Fujita (2022)    | 1         | 1  | 1  | 1  | 1             | 1  | 1       | 1  | 0  | 8            | good          |
|                          | Toshida (2022)   | 0         | 1  | 1  | 1  | 1             | 1  | 1       | 1  | 0  | 7            | good          |
| Immunotherapy            | Akce (2021)      | 0         | 1  | 1  | 1  | 1             | 1  | 1       | 1  | 0  | 7            | good          |
|                          | Kim (2021)       | 0         | 1  | 1  | 1  | 1             | 1  | 1       | 1  | 1  | 8            | good          |
|                          | Matsumoto (2022) | 0         | 1  | 1  | 1  | 1             | 1  | 1       | 0  | 0  | 6            | poor          |
|                          | Guo (2022)       | 0         | 1  | 1  | 1  | 1             | 1  | 1       | 0  | 0  | 6            | poor          |
|                          | Chen (2023)      | 0         | 1  | 1  | 1  | 1             | 1  | 1       | 1  | 0  | 7            | good          |

Studies with 3 or 4 stars in selection domain AND 1 or 2 stars in comparability domain AND 2 or 3 stars in outcome/exposure domain were judged as good quality;

studies with 2 stars in selection domain AND 1 or 2 stars in comparability domain AND 2 or 3 stars in outcome/exposure domain were judged as moderate

quality;

studies with 0 or 1 star in selection domain OR 0 stars in comparability domain OR 0 or 1 stars in outcome/exposure domain were judged as low quality.

The questions in each domain were as follows.

#### Selection:

Q1. Representativeness of exposed cohort: 1, truly or somewhat representative of a population-based or multi-center study; 0, selected group of users or lack of description of the derivation of the cohort.

Q2. Selection of non-exposed cohort: 1, drawn from the same community as the exposed cohort; 0, drawn from a different source or lack of description of the derivation of the non-exposed cohort.

Q3. Ascertainment of exposure: 1, secure record or structured interview; 0, written self-report or lack of description of validation.

Q4. Demonstration that outcome of interest was not present at start of study: 1, yes; 0, no.

#### Comparability:

Q1. Study adjusted for age and sex: 1, yes; 0, no

Q2. study controls for any additional factor: 1, yes; 0, no.

#### Outcome:

Q1. Assessment of outcome: 1, independent blind assessment, confirmed by medical records or record linkage; 0, self-reported or no description.

Q2. Was follow-up long enough for outcomes to occur: 1, duration of follow-up at least 2 years; 0, duration of follow-up < 2 years.

Q3. Loss to follow-up rate: 1, complete follow-up or loss to follow-up rate less than 20%; 0, loss to follow-up rate more than 20% or no statement.

**Table S5. Subgroup analysis of the prevalence of LSMM among HCC patients undergoing systemic therapy**

| Subgroup                 | Records (N) | Patients (N) | Prevalence (%) | 95% CI      | I <sup>2</sup> (%) |
|--------------------------|-------------|--------------|----------------|-------------|--------------------|
| <b>Overall</b>           | 21          | 2377         | 43.4           | 37.0 – 50.0 | 89.27              |
| <b>Treatment regimen</b> |             |              |                |             |                    |
| Sorafenib                | 10          | 1496         | 41.7           | 32.0–52.1   | 92.88              |
| Lenvatinib               | 5           | 447          | 45.5           | 32.1–59.5   | 87.34              |
| Immunotherapy            | 6           | 434          | 44.4           | 34.0-55.3   | 78.65              |
| <b>Study region</b>      |             |              |                |             |                    |
| Asian country            | 18          | 1946         | 42.2           | 34.7-50.1   | 90.63              |
| Non-Asian country        | 3           | 431          | 51.0           | 46.3–55.7   | 0                  |
| <b>Muscle measured</b>   |             |              |                |             |                    |
| SMI                      | 17          | 1894         | 44.5           | 37.7-51.6   | 87.85              |
| PMI                      | 4           | 483          | 38.9           | 22.7–58.0   | 93.69              |
| <b>Study quality</b>     |             |              |                |             |                    |
| Good                     | 18          | 2208         | 42.4           | 35.3–49.9   | 90.77              |
| Poor                     | 3           | 169          | 49.1           | 41.6-56.6   | 0                  |
| <b>Observation time</b>  |             |              |                |             |                    |
| ≥2 years                 | 17          | 2145         | 42.9           | 35.5–50.6   | 91.16              |
| <2 years                 | 4           | 232          | 45.5           | 36.8-54.4   | 42.95              |

SMI, Skeletal muscle mass index; PMI, psoas mass index; CI, confidence interval

**Table S6. Subgroup analysis of HR and 95% confidence interval of overall survival among HCC patients undergoing systemic therapy with and without LSMM**

| Subgroup                 | Records (N) | Patients (N) | HR   | 95% CI    | p       | I <sup>2</sup> (%) |
|--------------------------|-------------|--------------|------|-----------|---------|--------------------|
| <b>Overall</b>           | 20          | 2248         | 1.70 | 1.46–1.97 | < 0.001 | 29.27              |
| <b>Crude</b>             | 16          | 1730         | 1.68 | 1.44–1.95 | < 0.001 | 24.37              |
| <b>Adjusted</b>          | 16          | 1633         | 1.84 | 1.59–2.13 | < 0.001 | 11.07              |
| <b>Treatment regimen</b> |             |              |      |           |         |                    |
| Sorafenib                | 11          | 1496         | 1.74 | 1.41–2.14 | < 0.001 | 48.15              |
| Lenvatinib               | 5           | 447          | 1.71 | 1.22–2.41 | 0.002   | 15.13              |
| Immunotherapy            | 4           | 305          | 1.61 | 1.15–2.24 | 0.005   | < 0.01             |
| <b>Study region</b>      |             |              |      |           |         |                    |
| Asian country            | 17          | 1817         | 1.80 | 1.54–2.11 | < 0.001 | 15.54              |
| Non-Asian country        | 3           | 431          | 1.31 | 1.07–1.62 | 0.010   | < 0.01             |
| <b>Muscle measured</b>   |             |              |      |           |         |                    |
| SMI                      | 16          | 1,765        | 1.74 | 1.44–2.10 | < 0.001 | 42.00              |
| PMI                      | 4           | 483          | 1.61 | 1.22–2.11 | 0.001   | < 0.01             |
| <b>Observation time</b>  |             |              |      |           |         |                    |
| ≥ 2 years                | 18          | 2,145        | 1.69 | 1.46–1.96 | < 0.001 | 28.24              |
| < 2 years                | 2           | 103          | 1.94 | 0.54–6.90 | 0.308   | 68.12              |

All OS studies were of “good” quality

SMI, Skeletal muscle mass index; PMI, psoas mass index; CI, confidence interval



**Table S7. Subgroup analysis HR and 95% confidence interval of progression free survival among HCC patients undergoing systemic therapy with and without LSMM**

| Subgroup                 | Records (N) | Patients (N) | HR   | 95% CI    | p       | I <sup>2</sup> (%) |
|--------------------------|-------------|--------------|------|-----------|---------|--------------------|
| <b>Overall</b>           | 13          | 1,400        | 1.32 | 1.16-1.51 | < 0.001 | < 0.01             |
| <b>Crude</b>             | 9           | 882          | 1.57 | 1.24-1.98 | < 0.001 | 42.37              |
| <b>Adjusted</b>          | 7           | 801          | 1.32 | 1.10-1.59 | 0.003   | < 0.01             |
| <b>Treatment regimen</b> |             |              |      |           |         |                    |
| Sorafenib                | 5           | 863          | 1.23 | 1.03–1.46 | 0.020   | < 0.01             |
| Lenvatinib               | 2           | 103          | 2.08 | 1.18–3.67 | 0.012   | < 0.01             |
| Immunotherapy            | 6           | 434          | 1.41 | 1.12-1.78 | 0.004   | < 0.01             |
| <b>Study region</b>      |             |              |      |           |         |                    |
| Asian area               | 12          | 1,343        | 1.34 | 1.17-1.54 | < 0.001 | < 0.01             |
| Non-Asian area           | 1           | 57           | 0.99 | 0.53–1.83 | 0.974   | < 0.01             |
| <b>Study quality</b>     |             |              |      |           |         |                    |
| Good                     | 10          | 1,231        | 1.27 | 1.10–1.46 | 0.001   | < 0.01             |
| Poor                     | 3           | 169          | 1.87 | 1.24-2.81 | 0.003   | < 0.0              |
| <b>Observation time</b>  |             |              |      |           |         |                    |
| Over 2 years             | 10          | 1,231        | 1.27 | 1.10–1.46 | < 0.001 | < 0.01             |
| Less than 2 years        | 3           | 169          | 1.87 | 1.24-2.81 | 0.003   | < 0.01             |

All PFS studies used SMI.

SMI, Skeletal muscle mass index; CI, confidence interval

**Figure S1. Publication bias analysis using funnel plots for**

(A) Prevalence, (B) HRs of overall survival, (C) HR of progression-free survival

(A) Prevalence (Egger's test:  $p, 0.10$ )

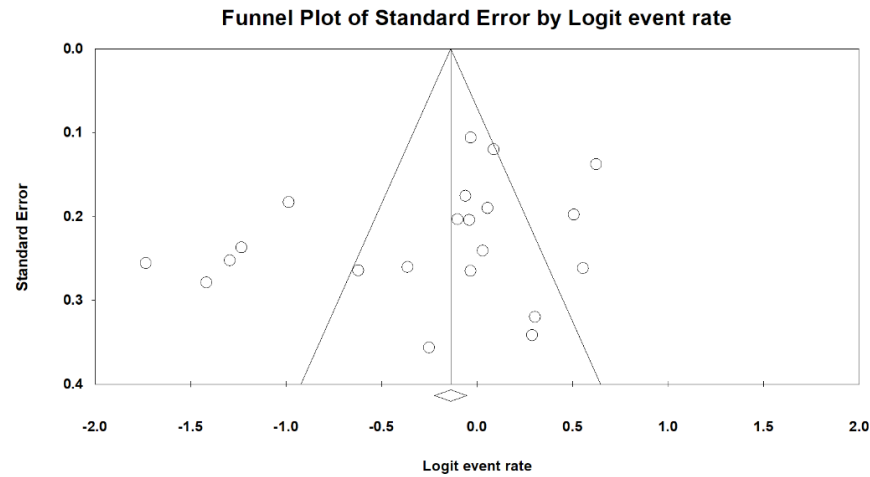

(B) HRs of overall survival (Egger's test:  $p, 0.20$ )

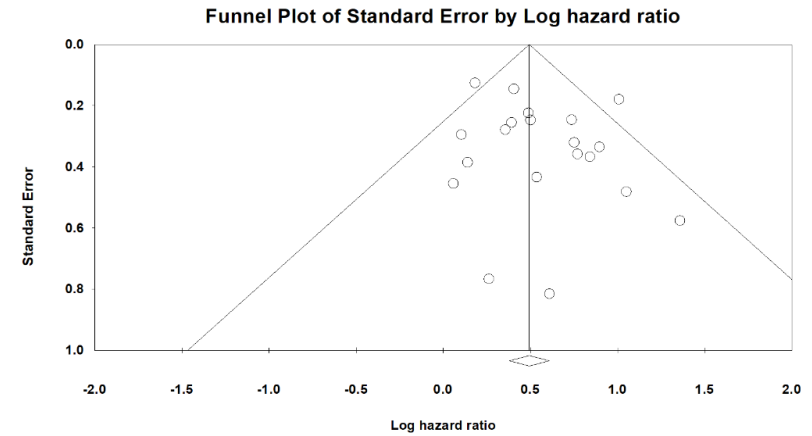

(C) HR of progression-free survival (Egger's test:  $p, 0.10$ )

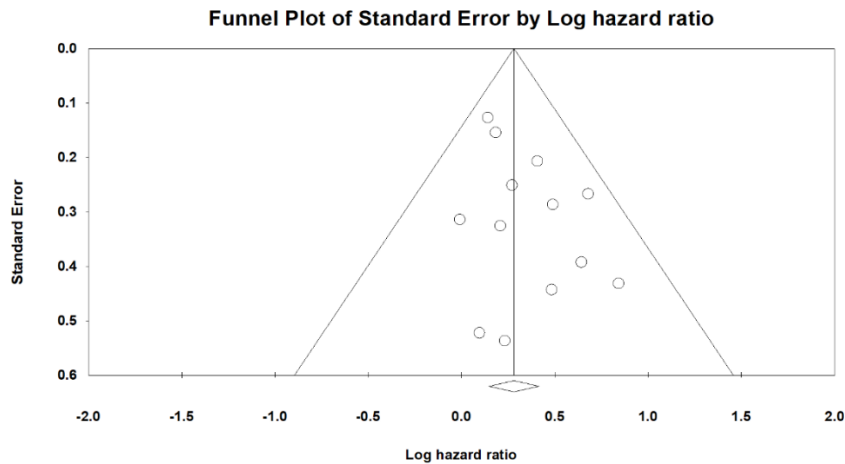

## Figure S2. Sensitivity analysis

(A) Prevalence, (B) Overall survival, (C) Progression-free survival

### (A) Prevalence

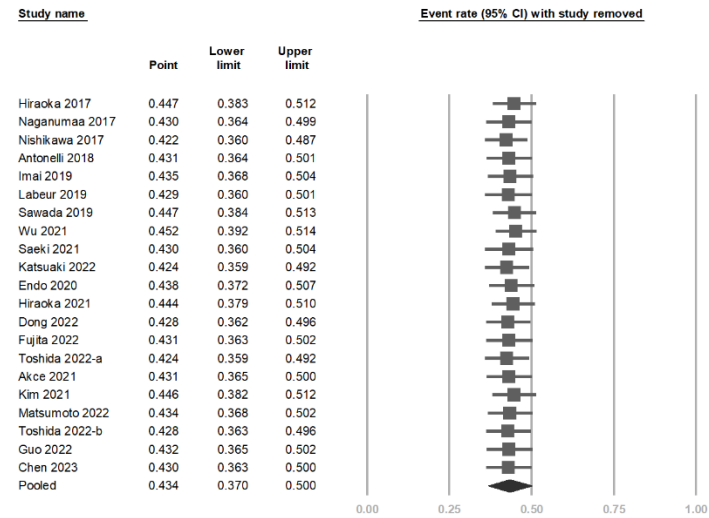

### (B) overall survival

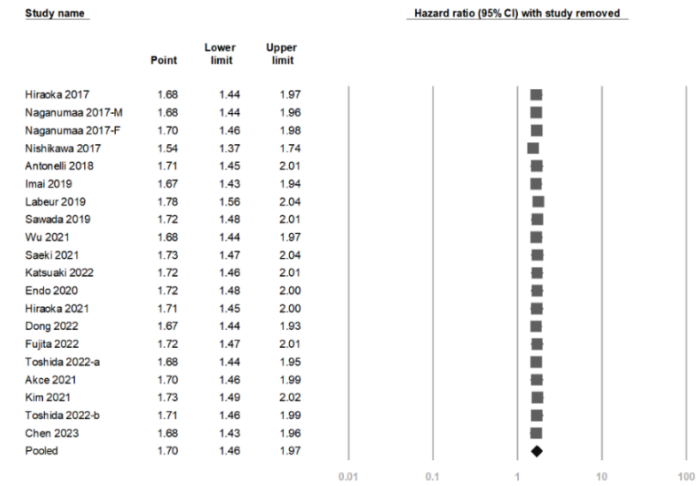

### (C) Progression-free survival

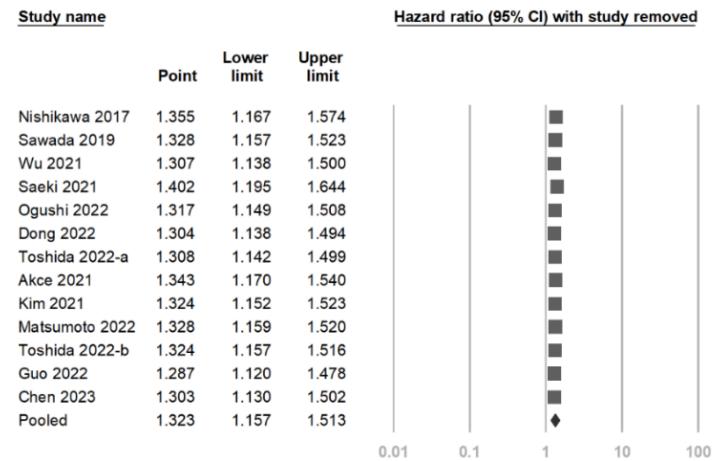

Supplement: s1 [file s1]
